# Supplementary material
Source: Elsevier journal article supplement (https://www.sciencedirect.com/science/article/pii/S2173572722001734)
Supplement: mmc1 [file S2173572722001734:mmc1.doc]

**Results of correlation and concordance between the formulas of imputation of PaO2, PaO2/FiO2, SpO2/FiO2 and PaO2, PaO2/FiO2 of arterial blood gases**

| **Method of Calculation** | **PaO2 of Arterial Blood Gases** | | | | | | | |
| --- | --- | --- | --- | --- | --- | --- | --- | --- |
|  | **ICC** | | | **95%CI** | | **p-value** | | |
| **PaO2 linear imputation** |  | **0,39** | | **(0,30** | **0,48)** | **0,300** | | |
| **PaO2 logarithmic imputation** |  | | **0,35** | **(0,25** | **0,45)** | **0,254** | | |
| **PaO2 non-linear imputation** |  | | **0,27** | **(0,16** | **0,38)** | **0,160** | | |
|  |  | |  |  |  |  |  |  |
| **PaO2/FiO2 linear imputation** |  | | **0,79** | **(0,76** | **0,82)** |  |  | **<0,001** |
| **PaO2/FiO2 logarithmic imputation** |  | | **0,77** | **(0,74** | **0,81)** |  |  | **<0,001** |
| **PaO2/FiO2 non-linear imputation** |  | | **0,78** | **(0,75** | **0,81)** |  |  | **<0,001** |
| **SpO2/FiO2 oximetry** |  | | **0,78** | **(0,75** | **0,81)** |  |  | **<0,001** |
|  |  | |  |  |  |  |  |  |
| **SpO2/FiO2 oximetry** |  | |  |  |  |  |  |  |
| **PEEP** |  | |  |  |  |  |  |  |
| **PEEP >= 10** |  | | **0,74** | **(0,67** | **0,80)** |  |  | **<0,001** |
| **PEEP < 10** |  | | **0,79** | **(0,75** | **0,83)** |  |  | **<0,001** |
|  |  | |  |  |  |  |  |  |
|  |  | |  |  |  |  |  |  |
| **Temperature ºC** |  | |  |  |  |  |  |  |
| **<36** |  | | **0,88** | **(0,68** | **0,95)** |  |  | **<0,001** |
| **>=36** |  | | **0,78** | **(0,74** | **0,81)** |  |  | **<0,001** |
|  |  | |  |  |  |  |  |  |
| **Total bilirubin** |  | |  |  |  |  |  |  |
| **TB >=3** |  | | **0,68** | **(0,23** | **0,87)** |  |  | **0,007** |
| **TB <3** |  | | **0,79** | **(0,73** | **0,83)** |  |  | **<0,001** |
|  |  | |  |  |  |  |  |  |
| **Vasoactive support** |  | |  |  |  |  |  |  |
| **0** |  | | **0,77** | **(0,72** | **0,80)** |  |  | **<0,001** |
| **1** |  | | **0,89** | **(0,83** | **0,93)** |  |  | **<0,001** |
| **2** |  | | **0,85** | **(0,16** | **0,97)** |  |  | **0,016** |
| **3** |  | | **0,97** | **(0,06** | **0,99)** |  |  | **0,026** |
| **4** |  | | **0,82** | **(0,45** | **0,94)** |  |  | **0,002** |
|  |  | |  |  |  |  |  |  |
| **Hemoglobin** |  | |  |  |  |  |  |  |
| **<=7 mg/dL** |  | | **0,59** | **(0,27** | **0,76)** |  |  | **0,001** |
| **>7 mg/dL** |  | | **0,80** | **(0,76** | **0,82)** |  |  | **0,000** |
| **Infiltrates on chest X-ray** |  | |  |  |  |  |  |  |
| **Yes** |  | | **0,44** | **(0,30** | **0,56)** |  |  | **<0,001** |
| **No** |  | | **0,36** | **(0,22** | **0,48)** |  |  | **<0,001** |
|  |  | |  |  |  |  |  |  |
| **Number of affected quadrants** |  | |  |  |  |  |  |  |
| **1** |  | | **0,41** | **(0,14** | **0,59)** |  |  | **0,003** |
| **2** |  | | **0,41** | **(0,17** | **0,59)** |  |  | **<0,001** |
| **3** |  | | **0,58** | **(-0,01** | **0,83)** |  |  | **0,027** |
| **4** |  | | **0,54** | **(0,06** | **0,78)** |  |  | **0,017** |

**Notes: SD Standard Deviation, ICC intraclass correlation coefficient, PaO2 partial pressure of arterial oxygen PEEP positive end-expiratory pressure**

**Characteristics of arterial blood gases and ventilatory parameters of the population**

| **Characteristics** | **General Population n=664** | | **PEEP< 10 cmH2O**  **n=438** | | | **PEEP>10 cmH2O**  **n=226** | | **p-value** | |
| --- | --- | --- | --- | --- | --- | --- | --- | --- | --- |
| **Ventilatory parameters (SD)** |  |  | |  |  |  |  | |  |
| **Tidal volume (ml)** | **481,0** | **(58,3)** | | **477,5** | **(56,6)** | **487,9** | **(60,8)** | | **0,029** |
| **FiO2** | **0,50** | **(0,2)** | | **0,50** | **(0,2)** | **0,52** | **(0,19)** | | **0,194** |
| **Pplat** | **19,3** | **(4,3)** | | **18,6** | **(3,6)** | **20,6** | **(5,0)** | | **<0,001** |
| **Ppeak** | **24,9** | **(4,9)** | | **24,0** | **(4,1)** | **26,6** | **(5,7)** | | **<0,001** |
| **Driving pressure** | **10,8** | **(4,1)** | | **11,1** | **(3,6)** | **10,2** | **(4,7)** | | **0,009** |
|  |  |  | |  |  |  |  | |  |
| **Arterial blood gases (SD)** |  |  | |  |  |  |  | |  |
| **pH** | **7,35** | **(0,1)** | | **7,36** | **(0,1)** | **7,33** | **(0,12)** | | **0,004** |
| **PaO2** | **83,7** | **(27,5)** | | **85,1** | **(28,2)** | **80,8** | **(25,8)** | | **0,053** |
| **PaCo2** | **38,3** | **(10,5)** | | **37,3** | **(10,1)** | **40,1** | **(11,0)** | | **0,001** |
| **HCO3** | **20,4** | **(5,2)** | | **20,4** | **(5,2)** | **20,2** | **(5,1)** | | **0,686** |
| **HCO3e** | **19,1** | **(4,5)** | | **19,3** | **(4,6)** | **18,8** | **(4,3)** | | **0,171** |
| **BE** | **-5,8** | **(5,6)** | | **-5,5** | **(5,7)** | **-6,4** | **(5,5)** | | **0,060** |
| **Hb** | **12,0** | **(3,0)** | | **11,8** | **(3,0)** | **12,3** | **(3,1)** | | **0,099** |
| **BE** | **2,8** | **(2,2)** | | **2,7** | **(2,2)** | **2,9** | **(2,2)** | | **0,179** |
| **Sat Art O2** | **92,1** | **(4,0)** | | **92,7** | **(5,5)** | **91,8** | **(3,1)** | | **0,019** |
| **SpO2** | **92,1** | **(4,1)** | | **92,8** | **(5,6)** | **91,8** | **(3,1)** | **0,017** | |
| **Lactate** | **2,8** | **(2,2)** | | **3,3** | **(2,6)** | **2,5** | **(1,9)** | | **<0,001** |
| **Oxygenation indexes (SD)** |  |  | |  |  |  |  |  | |
| **PaO2/FiO2 of arterial blood gases** | **184,2** | **(79,8)** | | **191,2** | **(85,8)** | **170,6** | **(64,5)** | | **<0,001** |
| **PaO2 linear imputation** | **71,3** | **(16,3)** | | **72,3** | **(16,2)** | **69,4** | **(16,5)** | **0,031** | |
| **PaO2/FiO2 linear imputation** | **168,7** | **(78,8)** | | **173,5** | **(81,1)** | **159,3** | **(73,5)** | | **0,024** |
| **PaO2 Logarithmic** | **53,4** | **(13,6)** | | **54,2** | **(14,0)** | **51,8** | **(12,9)** | **0,033** | |
| **PaO2/FiO2 Logarithmic imputation** | **128,0** | **(67,7)** | | **132,0** | **(70,3)** | **120,2** | **(61,7)** | | **0,027** |
| **PaO2 Non-linear imputation** | **68,5** | **(16,1)** | | **69,9** | **(16,8)** | **65,8** | **(14,5)** | **0,001** | |
| **PaO2/FiO2 Non-linear imputation** | **156,0** | **(73,9)** | | **162,4** | **(79,5)** | **143,7** | **(60,2)** | | **0,001** |
| **SpO2/FiO2** | **205,7** | **(66,2)** | | **209,7** | **(68,1)** | **197,8** | **(61,7)** | **0,024** | |

**Notes: SD Standard Deviation, FiO2 the fraction of inspired oxygen, PaCO2 partial pressure of arterial carbon dioxide, PaO2 partial pressure of arterial oxygen, PEEP positive end-expiratory pressure, Pplat plateau pressure, Ppeak peak pressure.**

**Results of correlation and concordance between the formulas of imputation of PaO2, PaO2/FiO2, SpO2/FiO2 and PaO2, PaO2/FiO2 of arterial blood gases**

| **Method of Calculation** | **PaO2 of Arterial Blood Gases** | | | | | | | |
| --- | --- | --- | --- | --- | --- | --- | --- | --- |
|  | **ICC** | | | **95%CI** | | **p-value** | | |
| **PaO2 linear imputation** |  | **0,39** | | **(0,30** | **0,48)** | **0,300** | | |
| **PaO2 logarithmic imputation** |  | | **0,35** | **(0,25** | **0,45)** | **0,254** | | |
| **PaO2 non-linear imputation** |  | | **0,27** | **(0,16** | **0,38)** | **0,160** | | |
|  |  | |  |  |  |  |  |  |
| **PaO2/FiO2 linear imputation** |  | | **0,79** | **(0,76** | **0,82)** |  |  | **<0,001** |
| **PaO2/FiO2 logarithmic imputation** |  | | **0,77** | **(0,74** | **0,81)** |  |  | **<0,001** |
| **PaO2/FiO2 non-linear imputation** |  | | **0,78** | **(0,75** | **0,81)** |  |  | **<0,001** |
| **SpO2/FiO2 oximetry** |  | | **0,78** | **(0,75** | **0,81)** |  |  | **<0,001** |
|  |  | |  |  |  |  |  |  |
| **SpO2/FiO2 oximetry** |  | |  |  |  |  |  |  |
| **PEEP** |  | |  |  |  |  |  |  |
| **PEEP >= 10** |  | | **0,74** | **(0,67** | **0,80)** |  |  | **<0,001** |
| **PEEP < 10** |  | | **0,79** | **(0,75** | **0,83)** |  |  | **<0,001** |
|  |  | |  |  |  |  |  |  |
|  |  | |  |  |  |  |  |  |
| **Temperature ºC** |  | |  |  |  |  |  |  |
| **<36** |  | | **0,88** | **(0,68** | **0,95)** |  |  | **<0,001** |
| **>=36** |  | | **0,78** | **(0,74** | **0,81)** |  |  | **<0,001** |
|  |  | |  |  |  |  |  |  |
| **Total bilirubin** |  | |  |  |  |  |  |  |
| **TB >=3** |  | | **0,68** | **(0,23** | **0,87)** |  |  | **0,007** |
| **TB <3** |  | | **0,79** | **(0,73** | **0,83)** |  |  | **<0,001** |
|  |  | |  |  |  |  |  |  |
| **Vasoactive support** |  | |  |  |  |  |  |  |
| **0** |  | | **0,77** | **(0,72** | **0,80)** |  |  | **<0,001** |
| **1** |  | | **0,89** | **(0,83** | **0,93)** |  |  | **<0,001** |
| **2** |  | | **0,85** | **(0,16** | **0,97)** |  |  | **0,016** |
| **3** |  | | **0,97** | **(0,06** | **0,99)** |  |  | **0,026** |
| **4** |  | | **0,82** | **(0,45** | **0,94)** |  |  | **0,002** |
|  |  | |  |  |  |  |  |  |
| **Hemoglobin** |  | |  |  |  |  |  |  |
| **<=7 mg/dL** |  | | **0,59** | **(0,27** | **0,76)** |  |  | **0,001** |
| **>7 mg/dL** |  | | **0,80** | **(0,76** | **0,82)** |  |  | **0,000** |
| **Infiltrates on chest X-ray** |  | |  |  |  |  |  |  |
| **Yes** |  | | **0,44** | **(0,30** | **0,56)** |  |  | **<0,001** |
| **No** |  | | **0,36** | **(0,22** | **0,48)** |  |  | **<0,001** |
|  |  | |  |  |  |  |  |  |
| **Number of affected quadrants** |  | |  |  |  |  |  |  |
| **1** |  | | **0,41** | **(0,14** | **0,59)** |  |  | **0,003** |
| **2** |  | | **0,41** | **(0,17** | **0,59)** |  |  | **<0,001** |
| **3** |  | | **0,58** | **(-0,01** | **0,83)** |  |  | **0,027** |
| **4** |  | | **0,54** | **(0,06** | **0,78)** |  |  | **0,017** |
|  |  | |  |  |  |  |  |  |

**Notes: SD Standard Deviation, ICC intraclass correlation coefficient, PaO2 partial pressure of arterial oxygen PEEP positive end-expiratory pressure**

**Results of validity for physiologic variable, mechanical ventilation and radiological findings between SpO2/FiO2 and severe Hypoxemia PaO2/FiO2 <=150**

| **METHOD** | | | **AUC-ROC** | **CI 95 %** | | | **CUT-OFF POINT** | | **SENS** | **SPEC** | **PPV** | **NPV** | **LR+** | **LR-** | **P-VALUE** |
| --- | --- | --- | --- | --- | --- | --- | --- | --- | --- | --- | --- | --- | --- | --- | --- |
| **SpO2/FiO2 oximetry** | | |  |  | |  | |  |  |  |  |  |  |  |  |
| **PEEP >= 10** | | | **0,82** | **(0,77** | | **0,88)** | | **174,0** | **0,87** | **0,57** | **0,27** | **0,89** | **2,04** | **0,75** | **<0,001** |
| **PEEP < 10** | | | **0,84** | **(0,81** | | **0,88)** | | **190,0** | **0,65** | **0,89** | **0,19** | **0,82** | **5,67** | **0,13** | **<0,001** |
|  | | |  |  |  | |  | |  |  |  |  |  |  |  |
| **Temperature** | | |  |  |  | |  | |  |  |  |  |  |  |  |
| **<36** | | | **0,96** | **(0,88** | | **1,00)** | | **150,7** | **0,91** | **0,83** | **0,25** | **0,94** | **5,45** | **0,20** | **<0,001** |
| **>=36** | | | **0,83** | **(0,80** | | **0,86)** | | **188,0** | **0,66** | **0,82** | **0,20** | **0,82** | **3,68** | **0,22** | **<0,001** |
|  | | |  |  |  | |  | |  |  |  |  |  |  |  |
| **Total bilirubin** | | |  |  |  | |  | |  |  |  |  |  |  |  |
| **BT >=3** | | | **0,66** | **(0,41** | | **0,90)** | | **186,0** | **0,70** | **0,70** | **0,22** | **0,81** | **2,33** | **0,43** | **0,24** |
| **BT <3** | | | **0,92** | **(0,88** | | **0,96)** | | **222,5** | **0,84** | **0,89** | **0,24** | **0,91** | **7,40** | **0,13** | **<0,001** |
|  | | |  |  | |  | |  |  |  |  |  |  |  |  |
| **Vasoactive support** | | |  |  | |  | |  |  |  |  |  |  |  |  |
| **0** | | | **0,83** | **(0,79** | | **0,86)** | | **198,0** | **0,60** | **0,87** | **0,18** | **0,80** | **4,68** | **0,15** | **<0,001** |
| **1** | | | **0,85** | **(0,76** | | **0,93)** | | **151,6** | **0,98** | **0,58** | **0,29** | **0,98** | **2,35** | **0,71** | **<0,001** |
| **2** | | | **0,71** | **(0,22** | | **1,00)** | | **225,7** | **1,00** | **0,67** | **0,28** | **1,00** | **3,00** | **0,50** | **0,38** |
| **3** | | | **1,00** | **(1,00** | | **1,00)** | | **271,4** | **1,00** | **1,00** | **0,26** | **1,00** | **-** | **0,00** | **0,22** |
| **4** | | | **1,00** | **(1,00** | | **1,00)** | | **148,8** | **1,00** | **1,00** | **0,26** | **1,00** | **-** | **0,00** | **0,01** |
|  | | |  |  | |  | |  |  |  |  |  |  |  |  |
| **Hemoglobin** | | |  |  | |  | |  |  |  |  |  |  |  |  |
| **<=7 mg/dL** | | | **0,65** | **(0,50** | | **0,81)** | | **204,4** | **0,43** | **0,82** | **0,14** | **0,73** | **2,36** | **0,22** | **0,08** |
| **>7 mg/dL** | | | **0,85** | **(0,82** | | **0,88)** | | **198,0** | **0,63** | **0,87** | **0,19** | **0,81** | **4,77** | **0,15** | **<0,001** |
|  | | |  |  | |  | |  |  |  |  |  |  |  |  |
| **Infiltrates on chest X-ray** | | |  |  | |  | |  |  |  |  |  |  |  |  |
| **Yes** | | | **0,83** | **(0,79** | | **0,88)** | | **206,6** | **0,64** | **0,86** | **0,19** | **0,81** | **4,44** | **0,17** | **<0,001** |
| **No** | | | **0,84** | **(0,80** | | **0,88)** | | **188,0** | **0,67** | **0,83** | **0,20** | **0,82** | **3,91** | **0,21** | **<0,001** |
|  | | |  |  |  | |  | |  |  |  |  |  |  |  |
|  | | |  |  |  | |  | |  |  |  |  |  |  |  |
| **Affected quadrants** | | |  |  |  | |  | |  |  |  |  |  |  |  |
| **1** | **0,76** | | | **(0,67** | | **0,85)** | | **220,0** | **0,48** | **0,92** | **0,15** | **0,77** | **5,76** | **0,09** | **<0,001** |
| **2** | **0,84** | | | **(0,78** | | **0,91)** | | **212,5** | **0,73** | **0,84** | **0,21** | **0,85** | **4,55** | **0,19** | **<0,001** |
| **3** | **0,87** | | | **(0,72** | | **1,00)** | | **225,0** | **0,82** | **0,90** | **0,23** | **0,90** | **8,18** | **0,11** | **<0,001** |
| **4** | | **0,94** | | **(0,86** | | **1,00)** | | **176,0** | **0,94** | **0,87** | **0,26** | **0,96** | **7,03** | **0,15** | **<0,001** |

**Notes: Sens sensitivity, Spec specificity; AUC-ROC area under the ROC curve. PPV positive predictive values, NPV negative predictive values, LR likelihood ratio**

**Figures**

**Bland & Altman figure showing the correlation between PaO2/FiO2 of arterial blood gases and PaO2/FiO2 imputed by non-linear, linear, and logarithmic methods**

**
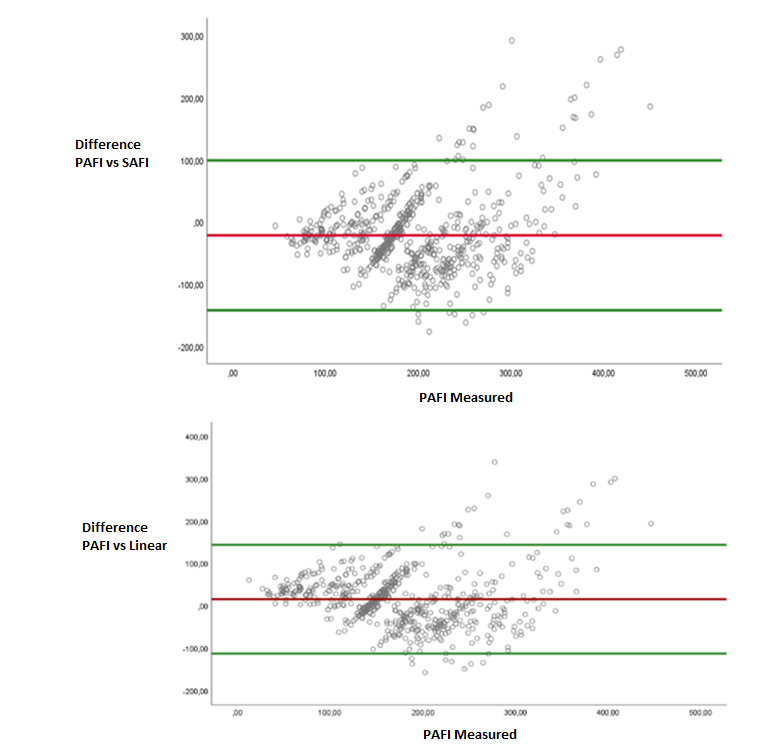
**

**
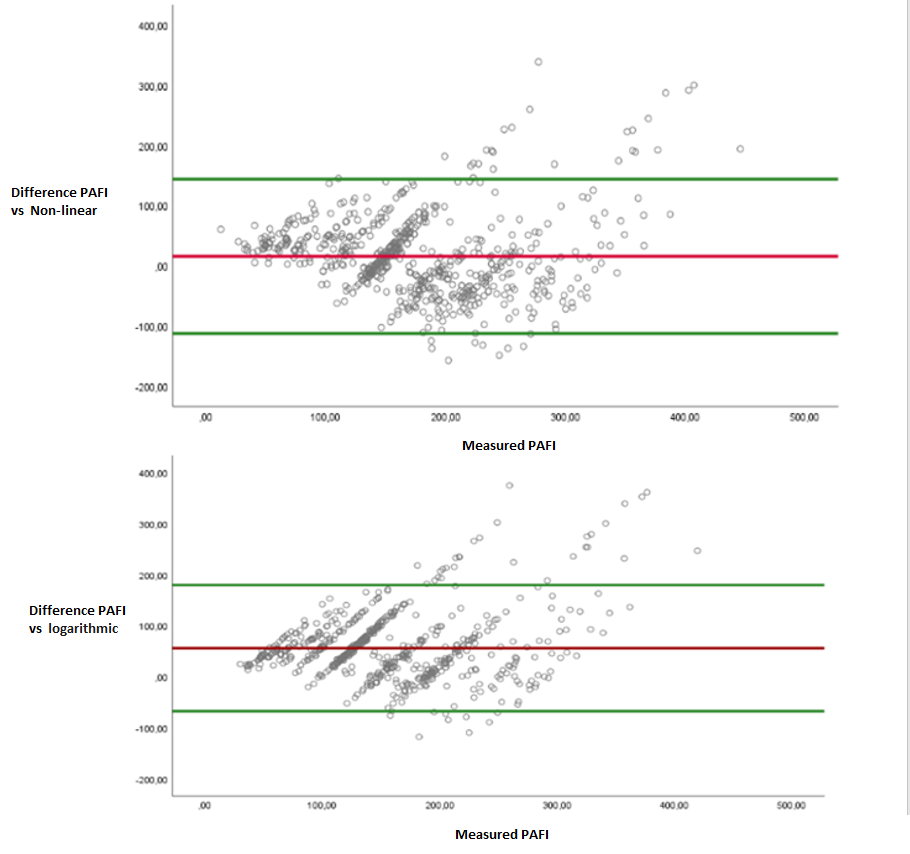
**
